# Supplementary material for: Single-step controlled synthesis of flower-like gold nanoparticles stabilized by chitosan for sensitive detection of heparin using a surface-enhanced Raman scattering method
Source: Royal Society of Chemistry journal article supplement (doi:10.1039/d2ra06528b), 2022-01-01
Supplement: d2ra06528b1.pdf [file d2ra06528b1.pdf]

## SINGLE-STEP CONTROLLED SYNTHESIS OF FLOWER-LIKE GOLD NANOPARTICLES STABILIZED BY CHITOSAN FOR SENSITIVE DETECTION OF HEPARIN USING SURFACE ENHANCED RAMAN SCATTERING METHOD

Thu Anh Nguyen<sup>a</sup>, Anh Nguyen Kim Do<sup>a</sup>, Tien Nu Hoang Lo<sup>b</sup>, In Park<sup>\*b,c</sup>, and Khuong Quoc Vo<sup>\*a</sup>

<sup>a</sup> Faculty of Chemistry, University of Science, Vietnam National University - Ho Chi Minh City, 227 Nguyen Van Cu Street, Ward 4, District 5, Ho Chi Minh City 70000, Vietnam.

<sup>b</sup> Research Institute of Clean Manufacturing System, Korea Institute of Industrial Technology (KITECH), 89 Yangdaegiro-Gil, Ipjang-myeon, Cheonan 31056, South Korea.

<sup>c</sup> KITECH school, University of Science and Technology (UST), 176 Gajeong-dong, Yuseong-gu, Daejeon 34113, South Korea.

\*Corresponding authors

Email addresses: [vqkhuong@hcmus.edu.vn](mailto:vqkhuong@hcmus.edu.vn) (Khuong Quoc Vo),

[inpark@kitech.re.kr](mailto:inpark@kitech.re.kr) (In Park)

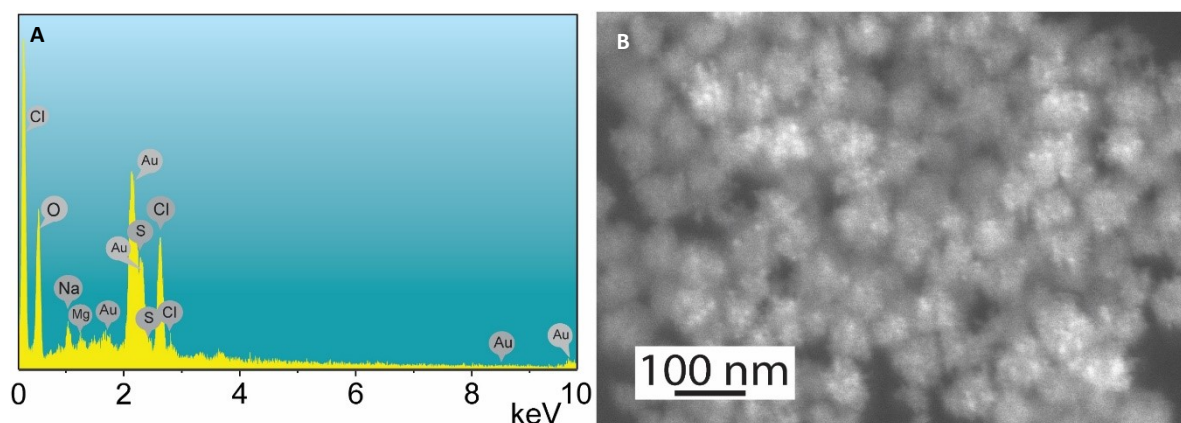

Fig. S1 (A) EDS spectroscopy and (B) corresponding SEM images of formed AuNFs-4-MBA@chitosan (scale bar 100 nm).

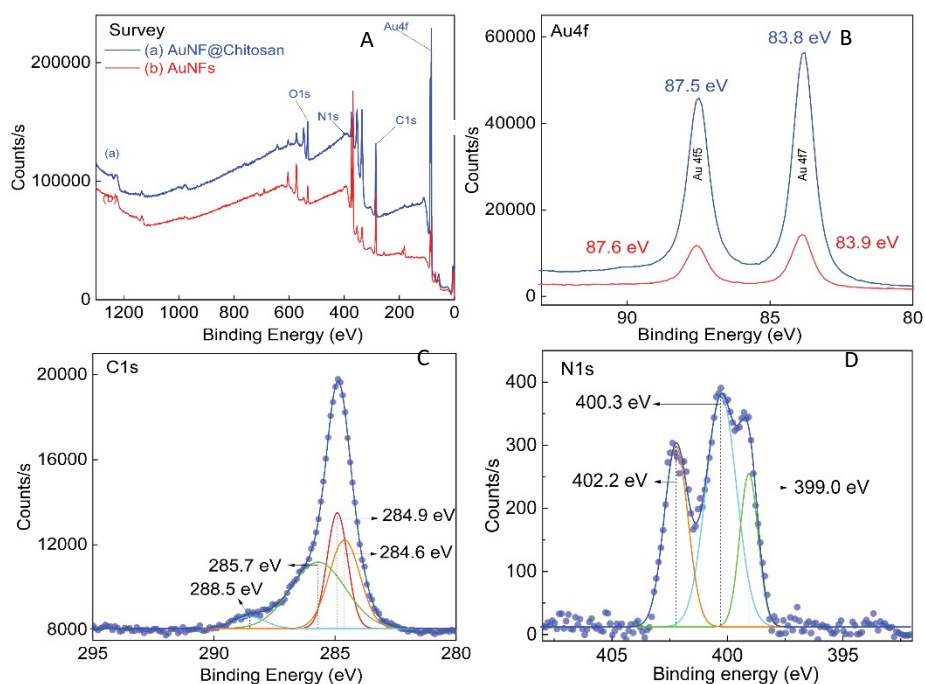

Fig S2. (A) XPS survey spectra of the AuNFs stabilized with chitosan, high-resolution XPS spectra of (B) Au4f, (C) C1s, and (D) N1s.

Table S1. FTIR band positions of AuNFs-chitosan, pure chitosan, pure heparin, and AuNF-chitosan-heparin.

| AuNFs-4-MBA@CS | Wavenumber (cm <sup>-1</sup> ) |          |                                 | Assignment                                              | Ref   |
|----------------|--------------------------------|----------|---------------------------------|---------------------------------------------------------|-------|
|                | Pure CS                        | Pure HEP | AuNFs-4-MBA@CS after adding HEP |                                                         |       |
| 3523           | 3447                           |          |                                 | O-H overlapped with N-H stretch                         | 1,2   |
| 3311           |                                |          |                                 |                                                         |       |
| 2916           | 2921                           |          |                                 | C-H stretch                                             | 1,3   |
| 1753           | 1700                           |          |                                 | Amide II stretch                                        |       |
| 1628           | 1657                           |          |                                 | C=O stretching in amide I acetyl amino in heparin       | 1,3   |
|                |                                | 1620     | 1621                            |                                                         | 4     |
|                | 1539                           |          | 1539                            | N-H stretch (amide II)                                  | 1,2,5 |
| 1392           | 1409                           |          |                                 | Asymmetric C-H stretch bending of CH <sub>2</sub> group | 1     |
|                | 1369                           |          |                                 | Amide III                                               |       |
|                | 1319                           | 1313     |                                 | C-O stretch, S=O                                        | 6     |
|                |                                | 1233     | 1233                            | N-sulphonate                                            | 7-9   |
| 1112           |                                |          |                                 | C-H symmetrical bending                                 | 10    |
| 1018           | 1066                           |          |                                 | Skeletal vibration C-O bridge (glucosamine)             | 1,10  |
| 869            |                                | 890      |                                 | OH in-plane bending                                     | 10    |
|                |                                |          |                                 | Coupling of C-O-S and ring C-O-C                        | 11    |

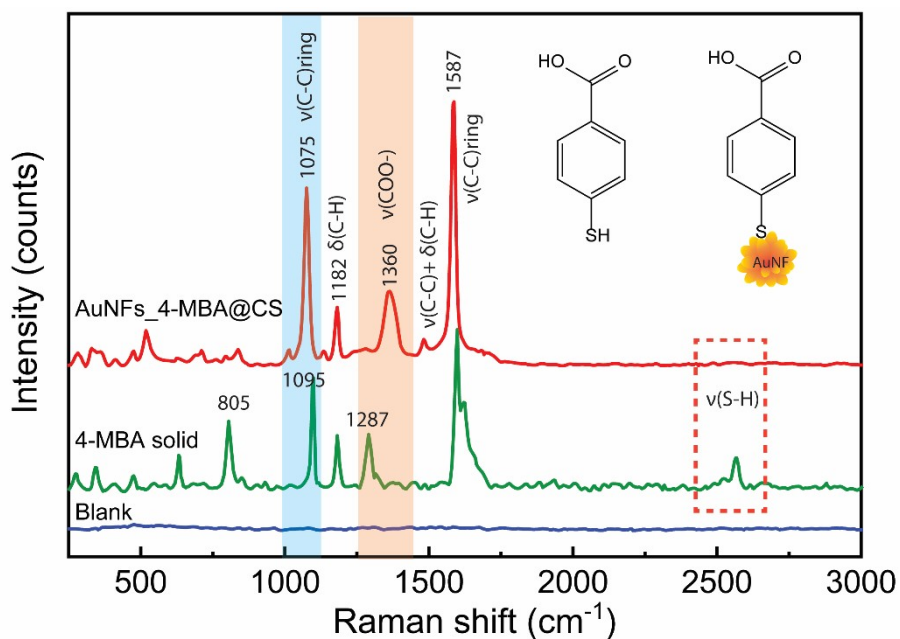

Fig S3. Compared SERS spectroscopy of (A) 4-MBA solid and (B) AuNFs-MBA@CS after adding chitosan.

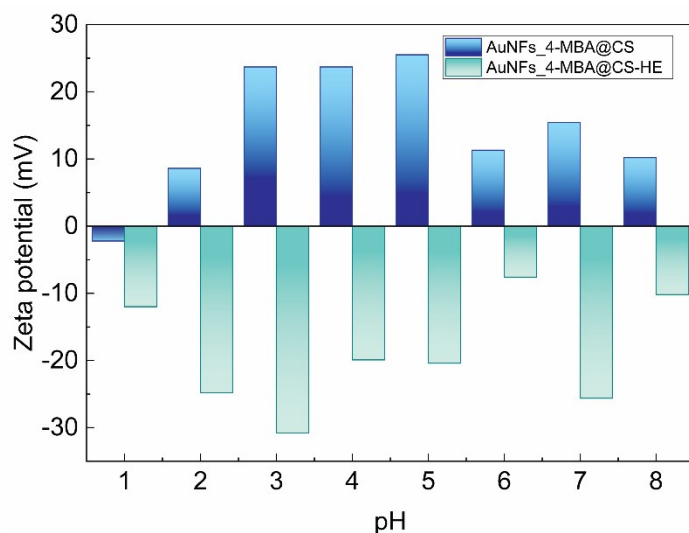

Fig S4. Zeta potential of AuNFs-chitosan (blue column), and AuNFs-4-MBA@chitosan-heparin (green-column).

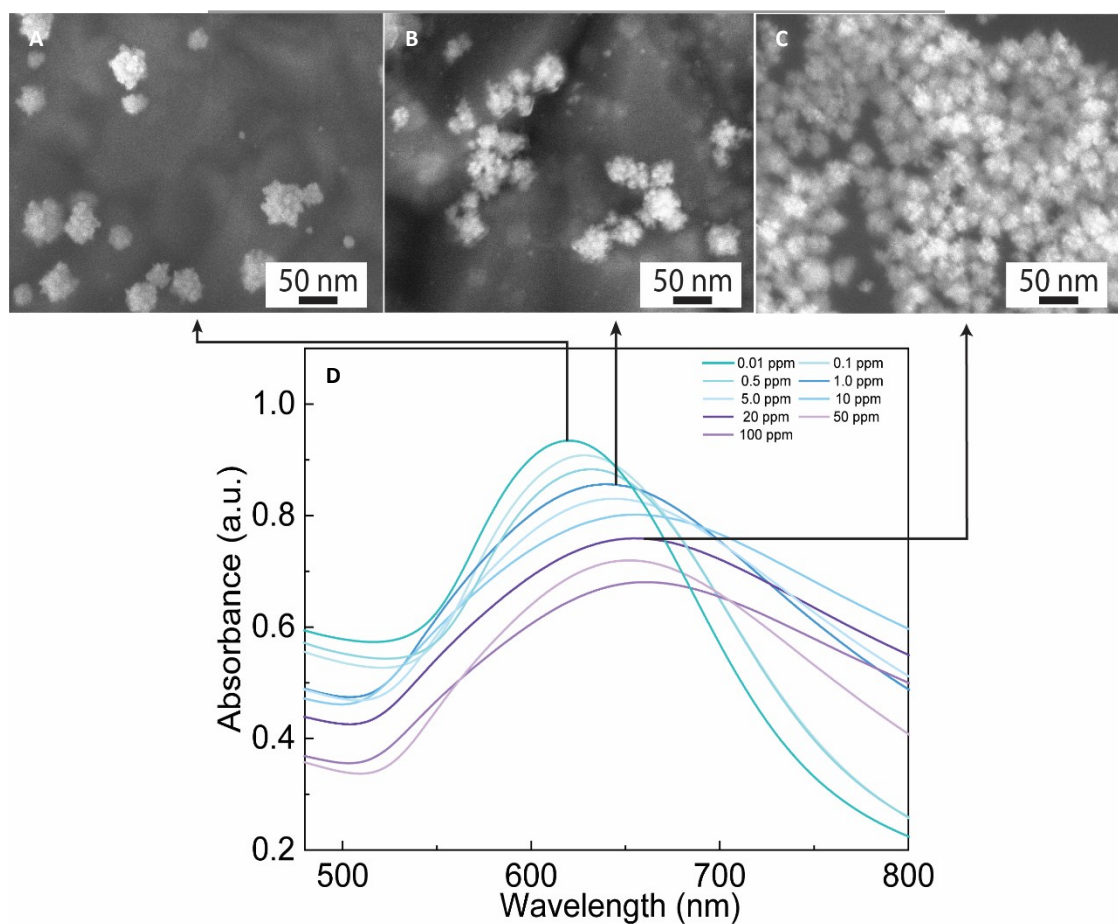

Fig S5. (A), (B), (C) SEM images of colloidal SERS tags after adding 0.01, 1.0, and 20 ppm concentration of heparin, and (D) UV-Vis spectrum of AuNFs-4-MBA@Chitosan colloids added with different heparin concentrations ranging from 0.01 to 100 ppm

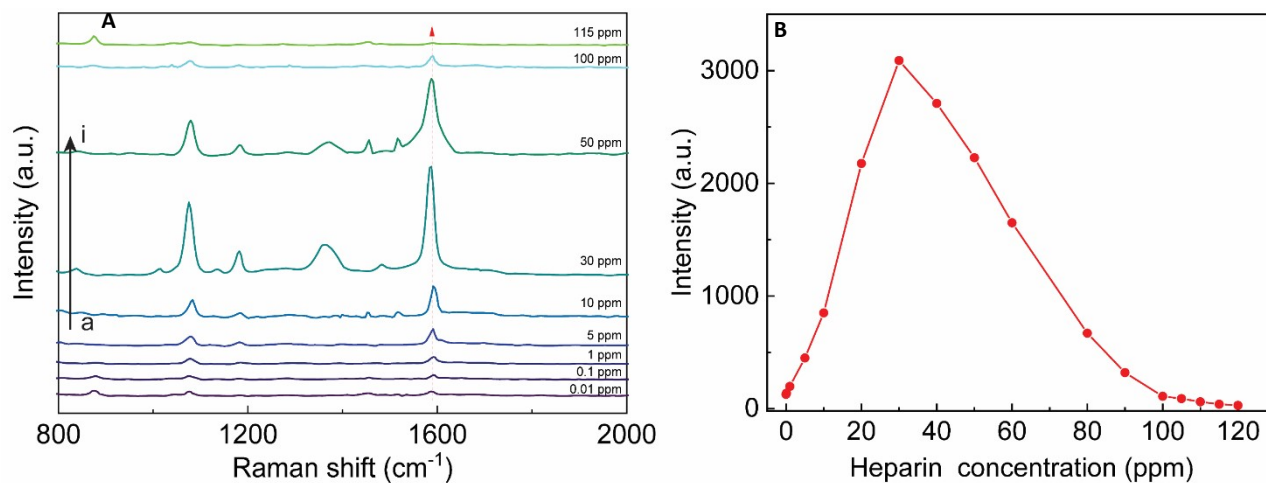

Fig S6. (A) SERS spectra of AuNFs-4-MBA@CS colloidal solution studied with different heparin concentrations (a-i: 0.01, 0.1, 1.0, 5.0, 10, 30, 50, 100, and 115 ppm); (B) Intensity change of Raman peak at  $1587\text{ cm}^{-1}$  while changing the heparin concentration.

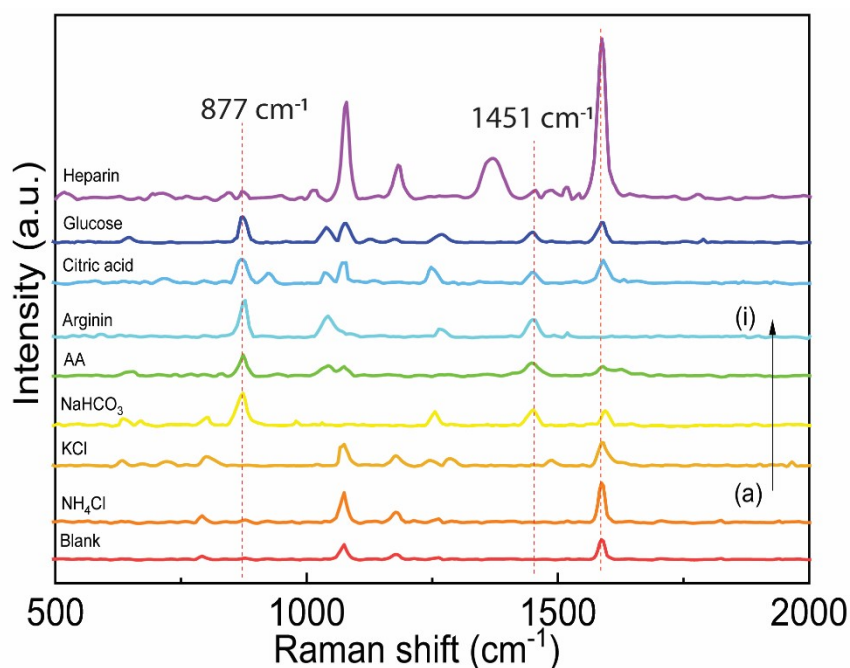

Figure S7. Compared SERS spectra of AuNFs-4-MBA@CS colloids after adding various substances (a-i: glucose, citric acid, arginine, ascorbic acid,  $\text{NaHCO}_3$ , KCl,  $\text{NH}_4\text{Cl}$ , and heparin) for studying the selectivity. The blank sample was investigated on the AuNFs-4-MBA@chitosan colloid without using any induced-aggregation substance.

## Reference

1. S. Kumar, J. Koh, H. Kim, M. K. Gupta and P. K. Dutta, *International journal of biological macromolecules*, 2012, **50**, 493-502.
2. S. Kumar and J. Koh, *Int J Mol Sci*, 2012, **13**, 6102-6116.
3. J. E. dos Santos, E. R. Dockal and É. T. Cavalheiro, *Carbohydrate polymers* 2005, **60**, 277-282.
4. R. Saravanan, S. Vairamani and A. Shanmugam, *Preparative biochemistry & biotechnology*, 2010, **40**, 305-315.
5. Q. K. Vo, D. D. Phung, Q. N. Vo Nguyen, H. Hoang Thi, N. H. Nguyen Thi, P. P. Nguyen Thi, L. G. Bach and L. Van Tan, 2019, **7**, 873.
6. A. Devlin, L. Mauri, M. Guerrini, E. Yates and M. Skidmore, *The use of ATR-FTIR spectroscopy to characterise crude heparin samples by composition and structural features*, 2019.
7. M. J. Harris and J. R. Turvey, *Carbohydrate Research*, 1970, **15**, 51-56.
8. D. Grant, C. Moffat, W. Long and F. Williamson, *Biochemical Society Transactions*, 1989, **17**, 498-500.
9. D. Grant, C. Moffat, W. Long and F. Williamson, *Biochemical Society Transactions*, 1989, **17**, 500-501.
10. s. Sashikala and S. Shafi, *Der Pharmacia Lettre*, 2014, **6**, 90-97.
11. F. Cabassi, B. Casu and A. S. Perlin, *Carbohydrate Research*, 1978, **63**, 1-11.

<sup>a</sup> Faculty of Chemistry, University of Science, Vietnam National University - Ho Chi Minh City, 227 Nguyen Van Cu Street, Ward 4, District 5, Ho Chi Minh City 70000, Vietnam.

<sup>b</sup> Research Institute of Clean Manufacturing System, Korea Institute of Industrial Technology (KITECH), 89 Yangdaegiro-Gil, Ipjang-myeon, Cheonan 31056, South Korea.

<sup>c</sup> KITECH school, University of Science and Technology (UST), 176 Gajeong-dong, Yuseong-gu, Daejeon 34113, South Korea.

\*Corresponding authors

Email addresses: vqkhuong@hcmus.edu.vn (Khuong Quoc Vo),

inpark@kitech.re.kr (In Park)

Electronic Supplementary Information (ESI) available: [details of any supplementary information available should be included here]. See DOI: 10.1039/x0xx00000x
